# Supplementary material for: Imaging analysis of six human histone H1 variants reveals universal enrichment of H1.2, H1.3, and H1.5 at the nuclear periphery and nucleolar H1X presence
Source: eLife journal article supplement (doi:10.7554/elife.91306), 2023-10-10

**A**

*Blots left panel (T47D, MCF-7, HeLa, HepG2, SK-N-SH)*

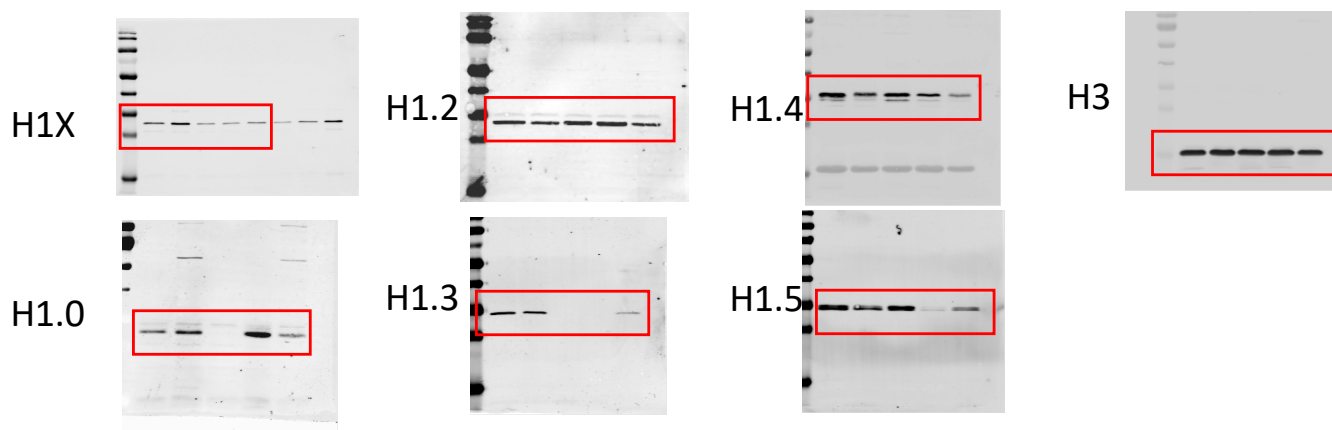

*Blots right panel (CaCo2, HCT-116, HT-29, 293T, NT2-D1)*

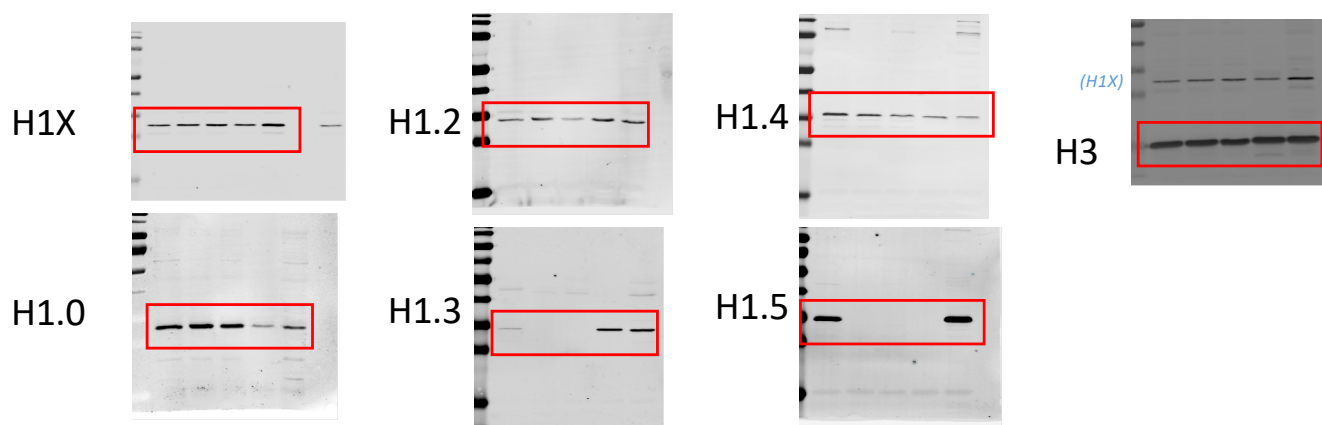

**C**

*Blots left panel (SK-MEL-147, SK-MEL-173, UACC-257)*

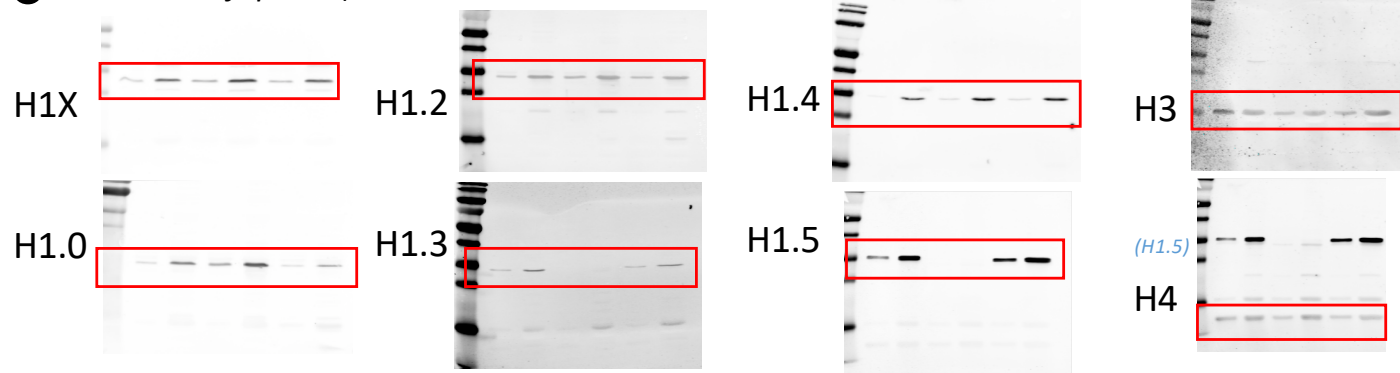

*Blots right panel (IGR-39, SK-MEL-28, WM266.4)*

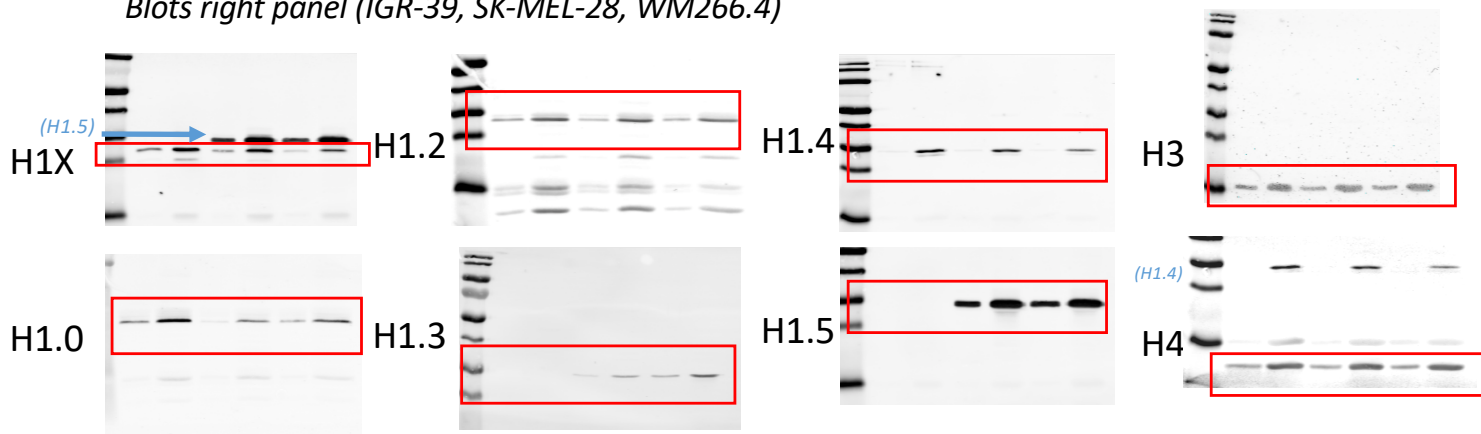

Supplement: fig5-figsupp1-data1 [file elife-91306-fig5-figsupp1-data1-v1.pdf]
